# Supplementary material
Source: publisher figshare collection journal article supplement (https://geolsoc.figshare.com/ndownloader/files/11999576)
Supplement: Supplementary file 1 [file 11999576]

## Sheet: Feuil1
Supplementary Table S2. Coefficient of correlation (r) for major and trace elements from El Peñon as described in the text.
Pliensbachian (margaritatus A-Zone, 0-10m):				T-OAE interval:				Complete section:
	r				r				r
	Al	TOC			Al	TOC			Al2O3
Zr	0.97	0.7		Zr	0.94	-0.07		SiO2	0.88
Ni	0.83	0.86		Ni	0.65	-0.07		TiO2	0.99
Cu	0.87	0.78		Cu	0.89	0.14		K2O	0.99
V	0.88	0.53		V	0.94	0.19		Na2O	0.76
Cr	0.98	0.78		Cr	0.97	0.29		Fe2O3	0.81
U	0.91	0.53		U	0.13	0.58		CaO	-0.91
Mo	0.42	0.86		Mo	0.46	0.52
